# Supplementary material for: Multi-omics profiling reveal cells with novel oncogenic cluster, TRAP1low/CAMSAP3low, emerge more aggressive behavior and poor-prognosis in early-stage endometrial cancer
Source: PubMed Central journal article supplement (PMC11181528; doi:10.1186/s12943-024-02039-2), 2024-06-17

**A**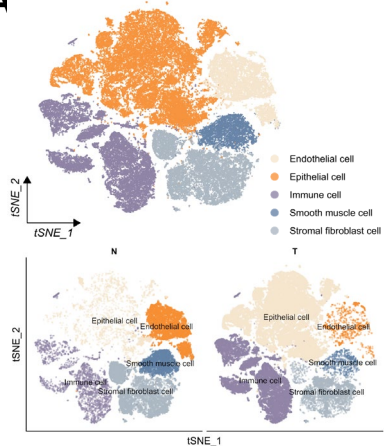

Down-regulated differential genes    Down-regulated prognostic proteins

**D**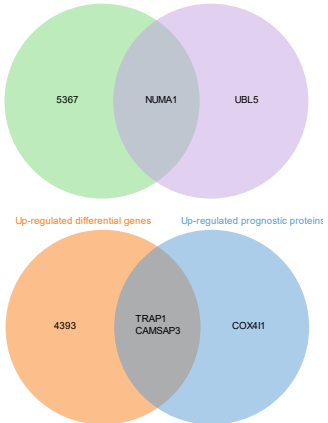**H**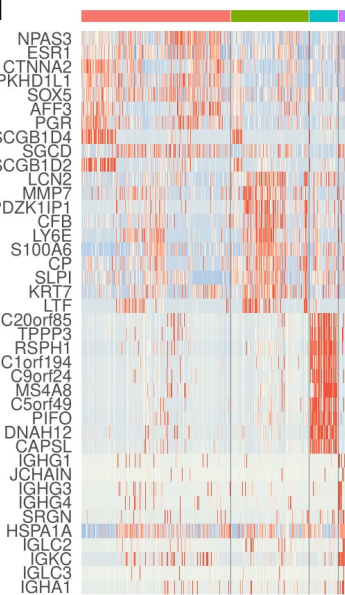**B**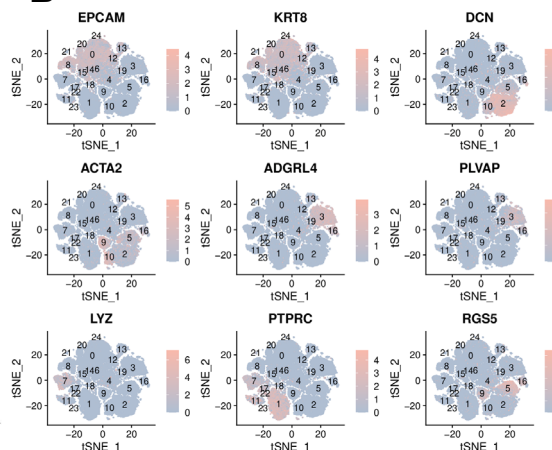**C**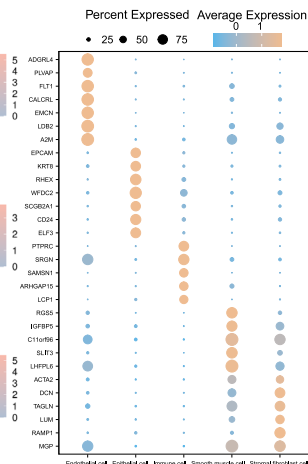**E**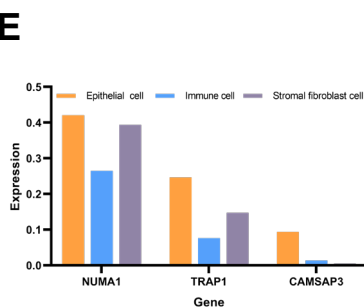**F**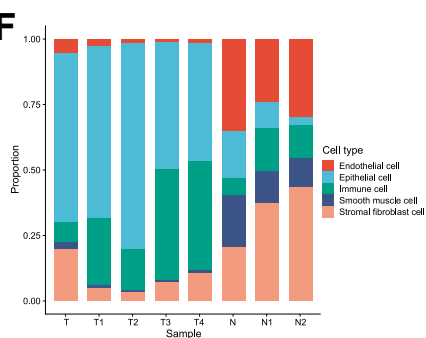**G**

Identity

- Glandular cell
- Luminal cell
- Ciliated epithelial cells
- Undefined

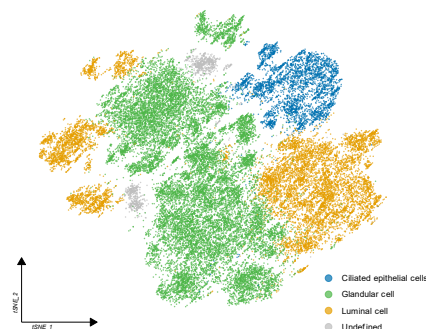

Expression

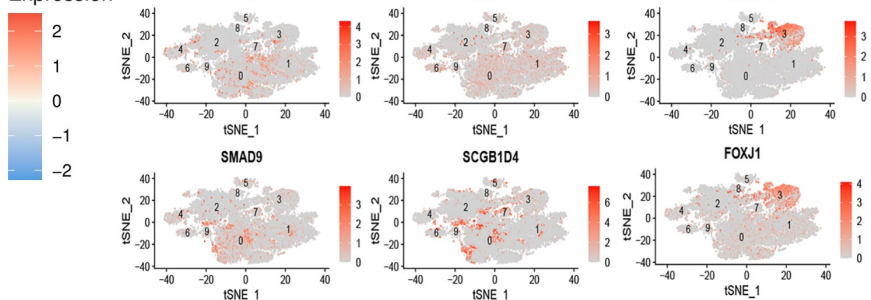

Supplement: 12943_2024_2039_MOESM3_ESM.pdf [file 12943_2024_2039_MOESM3_ESM.pdf]
