# Supplementary material for: Multi-omics profiling reveal cells with novel oncogenic cluster, TRAP1low/CAMSAP3low, emerge more aggressive behavior and poor-prognosis in early-stage endometrial cancer
Source: PubMed Central journal article supplement (PMC11181528; doi:10.1186/s12943-024-02039-2), 2024-06-17

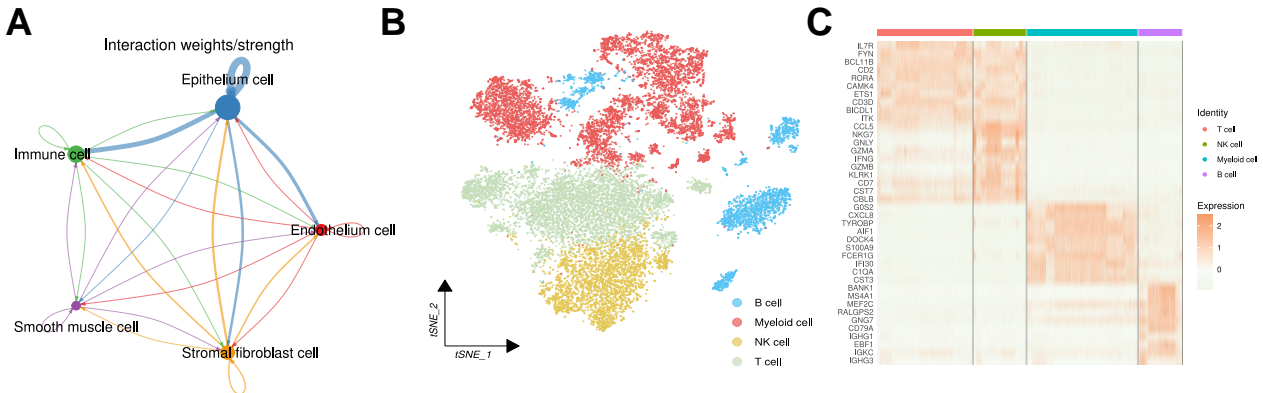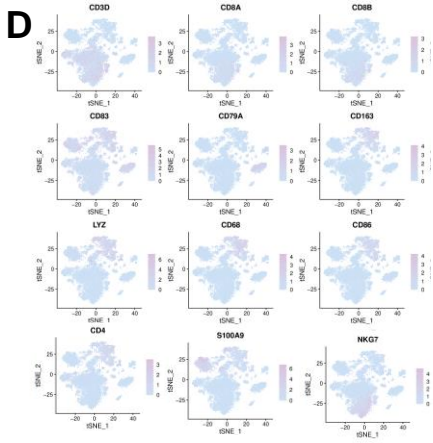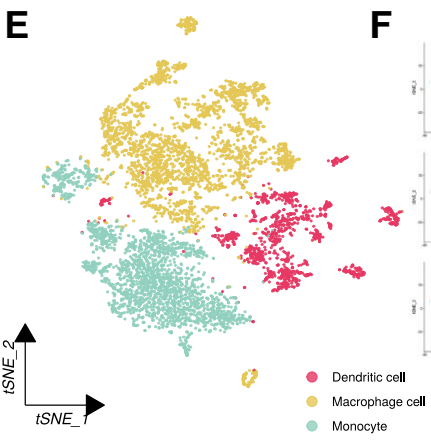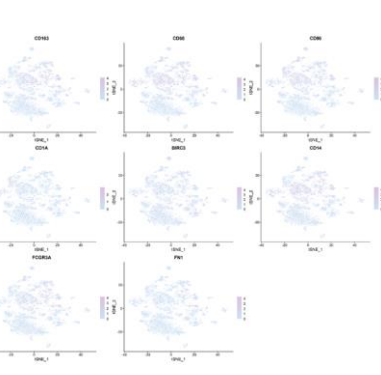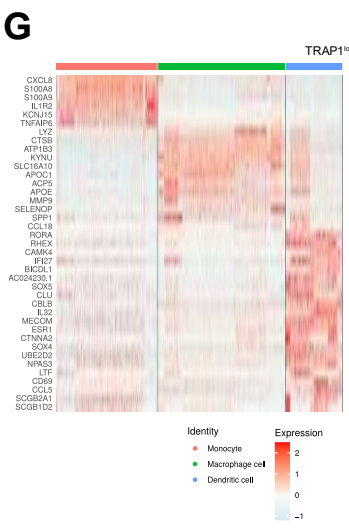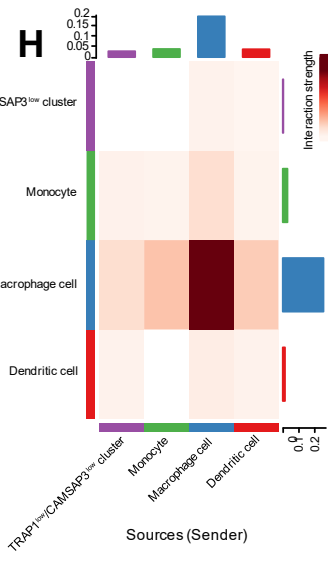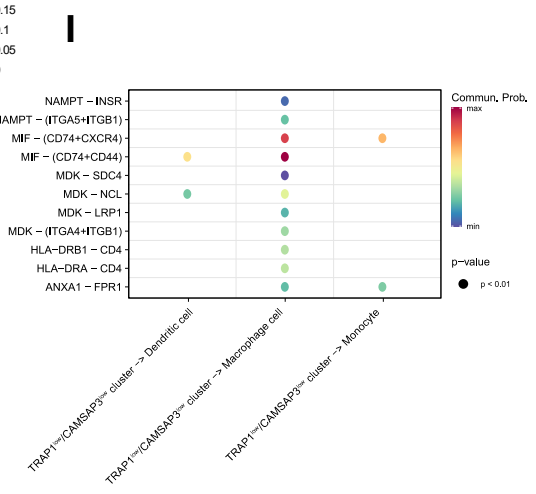

Supplement: 12943_2024_2039_MOESM5_ESM.pdf [file 12943_2024_2039_MOESM5_ESM.pdf]
